# Supplementary material
Source: ML conference proceedings conference paper supplement (https://proceedings.mlr.press/v80/ramdas18a.html)
Supplement: Supplementary file [file ramdas18a-supp.pdf]

---

# Supplementary Material for SAFFRON: an Adaptive Algorithm for Online Control of the False Discovery Rate

---

Aaditya Ramdas<sup>1</sup> Tijana Zrnic<sup>2</sup> Martin J. Wainwright<sup>1</sup> Michael I. Jordan<sup>1</sup>

## 1. Relationship to Storey-BH

Here, we provide details of the Benjamini-Hochberg (BH) procedure (1995), and of the relationship of its adaptive improvement, which we refer to as Storey-BH (Storey, 2002; Storey et al., 2004), to SAFFRON.

The Benjamini-Hochberg procedure is a classical method for guaranteeing FDR control in an offline setting, i.e. when all  $p$ -values are available before testing. Although the initial motivation for the BH method was different, it was reinterpreted by Storey et al. in the following manner. Since the small  $p$ -values are more likely to be non-null, suppose that one rejects all  $p$ -values below some fixed threshold  $s \in (0, 1)$ , meaning that  $\mathcal{R}(s) = \{i : P_i \leq s\}$ . Then, an oracle estimate for the FDP is given by:

$$\text{FDP}_{\text{BH}}^*(s) := \frac{|\mathcal{H}^0| \cdot s}{|\mathcal{R}(s)|}.$$

The numerator is a sensible estimate because the nulls are uniformly distributed, and hence we would expect about  $|\mathcal{H}^0| \cdot s$  many nulls to be below  $s$ . This is an ‘‘oracle’’ estimate because the scientist does not know  $|\mathcal{H}^0|$ . Ideally, one would like to choose a data-dependent  $s$  using the rule:

$$s^* := \max\{s : \text{FDP}_{\text{BH}}^*(s) \leq \alpha\},$$

and then reject the set  $\mathcal{R}(s^*)$ . Given  $n$   $p$ -values, the BH procedure overestimates the oracle FDP by the empirically computable quantity:

$$\widehat{\text{FDP}}_{\text{BH}}(s) := \frac{n \cdot s}{|\mathcal{R}(s)|},$$

and then rejects the set  $\mathcal{R}(\widehat{s}_{\text{BH}})$ , where  $\widehat{s}_{\text{BH}} := \max\{s : \widehat{\text{FDP}}_{\text{BH}}(s) \leq \alpha\}$ . On interpreting the BH procedure in

---

<sup>1</sup>Departments of Statistics and Electrical Engineering and Computer Sciences, University of California, Berkeley, Berkeley, USA <sup>2</sup>Department of Electrical Engineering and Computer Sciences, University of California, Berkeley, Berkeley, USA. Correspondence to: Aaditya Ramdas <aramdas@eecs.berkeley.edu>, Tijana Zrnic <tijana@eecs.berkeley.edu>, Martin J. Wainwright <wainwrig@eecs.berkeley.edu>, Michael I. Jordan <jordan@eecs.berkeley.edu>.

terms of an estimated FDP, Storey et al. (2002; 2004) noted that when the  $p$ -values are independent, the estimate  $\widehat{\text{FDP}}_{\text{BH}}$  underutilizes the available FDR budget  $\alpha$ . Indeed, when the  $p$ -values are exactly uniform, it is known (Benjamini & Yekutieli, 2001; Ramdas et al., 2017) to satisfy the stronger bound  $\text{FDR} = \alpha |\mathcal{H}^0|/n$ , which demonstrates that BH underutilizes the FDR budget of  $\alpha$  provided to it. Instead, Storey et al. pick a constant  $\lambda \in (0, 1)$ , and calculate:

$$\widehat{\text{FDP}}_{\text{StBH}}(s) := \frac{n \cdot s \cdot \widehat{\pi}_0}{|\mathcal{R}(s)|},$$

where the unknown proportion of nulls  $\pi_0 = |\mathcal{H}^0|/n$  is estimated as:

$$\widehat{\pi}_0 := \frac{1 + \sum_{i=1}^n \mathbf{1}\{P_i > \lambda\}}{n(1 - \lambda)}.$$

This procedure then calculates  $\widehat{s}_{\text{StBH}} := \max\{s : \widehat{\text{FDP}}_{\text{StBH}}(s) \leq \alpha\}$  and rejects the set  $\mathcal{R}(\widehat{s}_{\text{StBH}})$  which satisfies the bound  $\text{FDR} \leq \alpha$ . We refer to this improved method as Storey-BH. Storey et al. demonstrated via simulations that the Storey-BH procedure is typically more powerful than the BH procedure, the improvement increasing with the fraction of non-nulls, and the strength of underlying signal. Since procedures such as Storey-BH adapt to the unknown proportion of nulls, they are known in the multiple testing literature as adaptive procedures.

Both BH and LORD result from a trivial upper bound on an oracle estimate of the FDP. On the other hand, Storey-BH and SAFFRON *adapt* to the unknown amount of the provided FDR budget spent on testing nulls. In the particular setting of online FDR, this corresponds to keeping a running estimate of the amount of alpha-wealth that was spent on testing nulls thus far, and not the proportion of nulls  $\pi_0$ , like in the case of Storey-BH; unlike the offline setting where all  $p$ -values are compared to the same level  $\widehat{s}$ , different  $p$ -values have to pass different thresholds  $\alpha_i$ . In light of the above analysis, and additionally comparing the derivation of Storey-BH and SAFFRON, it is clear that Storey-BH is to BH as SAFFRON is to LORD.

It is in the above sense that SAFFRON is an adaptive online FDR method. As mentioned in Section 2.4, Foster and Stine’s alpha-investing procedure is a special case of

SAFFRON; hence, strictly speaking, alpha-investing would count as the first adaptive online FDR procedure (even though the motivation for alpha-investing in the original paper was entirely different, and did not mention estimating the FDP, or adaptivity). However, as noted in simulations by Javanmard and Montanari (2017), and re-confirmed in our simulations, alpha-investing seems *less* powerful than the non-adaptive algorithm LORD (and LORD++). As shown by simulations in Section 4, SAFFRON with constant  $\lambda = 1/2$  is more powerful than LORD across a variety of signal proportions and strengths, and hence is arguably the first adaptive algorithm in the online FDR setting that can compete with the non-adaptive algorithms.

## 2. Additional Simulation Results

Here we provide plots demonstrating the comparison of achieved power and FDR of SAFFRON and LORD, depending on the chosen sequence  $\{\gamma_j\}$ . More precisely, we vary the aggressiveness of the sequence, meaning that more aggressive sequences have a higher proportion of wealth concentrated around the beginning of the sequence.

Recall that, in the setting with Gaussian observations, null  $p$ -values are computed from samples of the form  $N(0, 1)$ , and  $p$ -values coming from the alternative are of the form  $N(F_1, 1)$ , where  $F_1 = (\mu_c, 1)$  for some constant  $\mu_c$ . The sequences considered for SAFFRON are of the form  $\gamma_j \propto j^{-s}$ , where the parameter  $s > 1$  controls the aggressiveness of the procedure; for LORD, in addition to considering these sequences, we also consider  $\gamma_j \propto \frac{\log(j\sqrt{2})}{je^{\sqrt{\log j}}}$ , which was shown to be the asymptotically optimal sequence for testing Gaussian means via the LORD method (Javanmard & Montanari, 2017). In Figure 1 and Figure 2 we consider  $F_1 = N(2, 1)$ , and show how the level of aggressiveness of the sequence  $\{\gamma_j\}$  affects the power and FDR of SAFFRON and LORD respectively. Figure 3 and Figure 4 demonstrate the same results in a similar, however easier, testing problem, with  $F_1 = N(3, 1)$ .

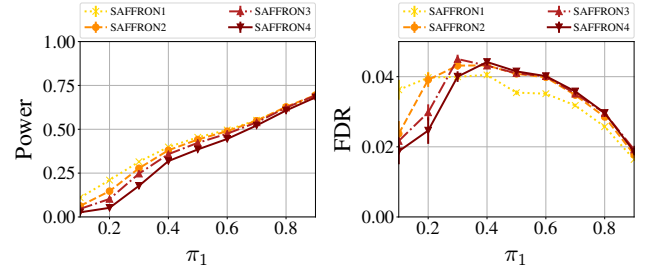

Figure 1. Statistical power and FDR versus fraction of non-null hypotheses  $\pi_1$  for SAFFRON (at target FDR level  $\alpha = 0.05$ ) using four different sequences  $\{\gamma_j\}$  of increasing aggressiveness. The observations under the alternative are Gaussian with  $\mu_i \sim N(2, 1)$  and standard deviation 1, and are converted into one-sided  $p$ -values as  $P_i = \Phi(-Z_i)$ .

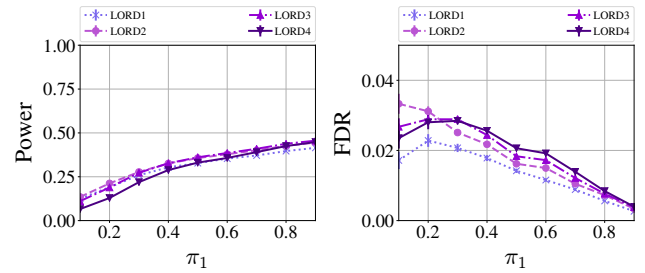

Figure 2. Statistical power and FDR versus fraction of non-null hypotheses  $\pi_1$  for LORD (at target FDR level  $\alpha = 0.05$ ) using four different sequences  $\{\gamma_j\}$  of increasing aggressiveness. The LORD1 method uses the sequence proposed in the paper (Javanmard & Montanari, 2017). The observations under the alternative are Gaussian with  $\mu_i \sim N(2, 1)$  and standard deviation 1, and are converted into one-sided  $p$ -values as  $P_i = \Phi(-Z_i)$ .

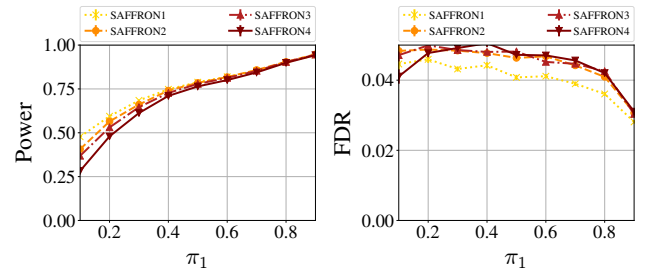

Figure 3. Statistical power and FDR versus fraction of non-null hypotheses  $\pi_1$  for SAFFRON (at target FDR level  $\alpha = 0.05$ ) using four different sequences  $\{\gamma_j\}$  of increasing aggressiveness. The observations under the alternative are Gaussian with  $\mu_i \sim N(3, 1)$  and standard deviation 1, and are converted into one-sided  $p$ -values as  $P_i = \Phi(-Z_i)$ .

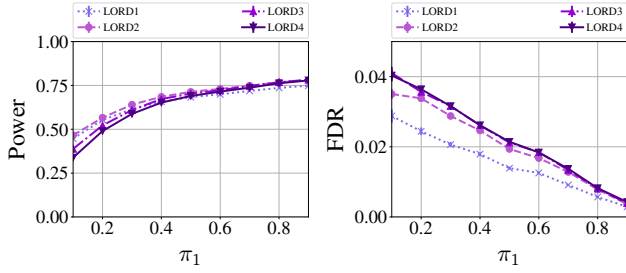

Figure 4. Statistical power and FDR versus fraction of non-null hypotheses  $\pi_1$  for LORD (at target FDR level  $\alpha = 0.05$ ) using four different sequences  $\{\gamma_j\}$  of increasing aggressiveness. The LORD1 method uses the sequence proposed in the paper (Javanmard & Montanari, 2017). The observations under the alternative are Gaussian with  $\mu_i \sim N(3, 1)$  and standard deviation 1, and are converted into one-sided  $p$ -values as  $P_i = \Phi(-Z_i)$ .

In the setting with beta alternatives, null  $p$ -values are uniformly distributed, and  $p$ -values coming from the alternative are distributed as  $\text{Beta}(m, n)$ . For SAFFRON we again consider sequences  $\gamma_j \propto j^{-s}$ , where we vary  $s > 1$ , and for LORD we additionally consider  $\gamma_j \propto (\frac{1}{j} \log j)^{1/m}$ , which was shown to be asymptotically optimal or this testing setting (Javanmard & Montanari, 2017). Please refer to the Supplementary Material for plots of achieved power and FDR of SAFFRON and LORD obtained by varying the sequence. Figure 5 and Figure 6 show the changes in performance of SAFFRON and LORD respectively with increasing  $s$ ; i.e., increasing aggressiveness of the sequence  $\{\gamma_j\}$ , where for the particular distribution of the observed  $p$ -values we choose  $m = 0.5$  and  $n = 5$ .

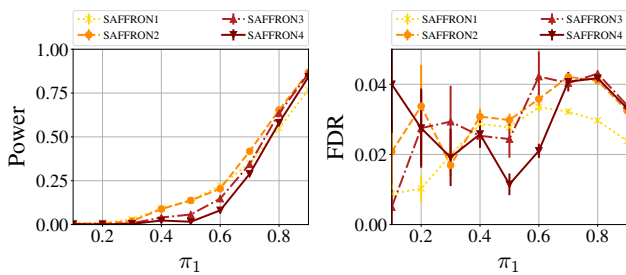

Figure 5. Statistical power and FDR versus fraction of non-null hypotheses  $\pi_1$  for SAFFRON using four different sequences  $\{\gamma_j\}$  of increasing aggressiveness. Under the alternative the  $p$ -values are distributed as  $\text{Beta}(0.5, 5)$ .

### 3. Monotonicity of SAFFRON

In applying the reverse super-uniformity lemma in Section 3 to prove that SAFFRON controls the FDR, it is assumed that SAFFRON is a monotone rule, meaning that

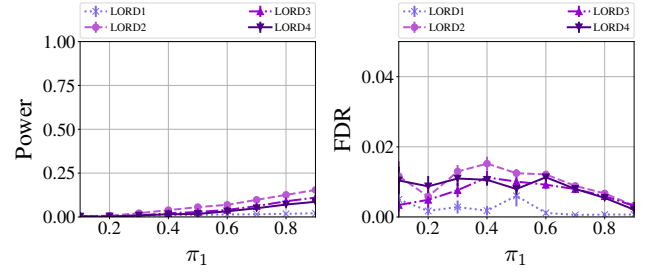

Figure 6. Statistical power and FDR versus fraction of non-null hypotheses  $\pi_1$  for LORD using four different sequences  $\{\gamma_j\}$  of increasing aggressiveness. The LORD1 method uses the sequence proposed in the paper (Javanmard & Montanari, 2017). Under the alternative the  $p$ -values are distributed as  $\text{Beta}(0.5, 5)$ .

$f_t : (R_{1:T}, C_{1:T}) \mapsto \alpha_t$  is a coordinatewise non-decreasing function. Here we provide a proof of this claim. We prove it assuming  $\lambda$  is constant, however the same arguments can be applied if it changes at every step, i.e. if it is predictable as stated in Section 3.

Consider some  $(R_{1:T}, C_{1:T})$  and  $(\tilde{R}_{1:T}, \tilde{C}_{1:T})$  for a fixed  $T$ . We will accordingly denote all relevant variables in the SAFFRON procedures which result in  $(R_{1:T}, C_{1:T})$  and  $(\tilde{R}_{1:T}, \tilde{C}_{1:T})$ , e.g.  $\alpha_t$  and  $\tilde{\alpha}_t$ , respectively. Taking into account the possible relations between indicators for rejection and candidacy,  $(\tilde{R}_{1:T}, \tilde{C}_{1:T}) \succeq (R_{1:T}, C_{1:T})$  if and only if, for every  $t \leq T$ , one of the following holds:

- (i)  $R_t = \tilde{R}_t$  and  $C_t = \tilde{C}_t$ ,
- (ii)  $R_t = 0, C_t = 1$  and  $\tilde{R}_t = 1, \tilde{C}_t = 1$ ,
- (iii)  $R_t = 0, C_t = 0$  and  $\tilde{R}_t = 0, \tilde{C}_t = 1$ ,
- (iv)  $R_t = 0, C_t = 0$  and  $\tilde{R}_t = 1, \tilde{C}_t = 1$ .

From this it is clear that the procedure which generated  $(R_{1:T}, C_{1:T})$  up to time  $T$  could not have made more rejections or encountered more candidate  $p$ -values. Further, at each time that it made a rejection, the procedure that generated  $(\tilde{R}_{1:T}, \tilde{C}_{1:T})$  also made a rejection. Looking into the SAFFRON update rule for the rejection thresholds, recall that  $\alpha_t$  is computed as:

$$\alpha_t := \min\{\lambda, \bar{\alpha}_t\}, \quad \text{where } \bar{\alpha}_t := W_0 \gamma_{t-C_{0+}} + ((1-\lambda)\alpha - W_0) \gamma_{t-\tau_1-C_{1+}} + \sum_{j \geq 2} (1-\lambda) \alpha \gamma_{t-\tau_j-C_{j+}}.$$

Note that, by construction, the terms  $((1-\lambda)\alpha - W_0)$  and  $(1-\lambda)\alpha$  are strictly positive. Therefore, since the sequence  $\{\gamma_j\}$  is non-increasing, the sum of the terms  $(1-\lambda)\alpha \gamma_{t-\tau_j-C_{j+}}$  contributing to  $\alpha_t$  is at most as great as the the sum of the terms  $(1-\lambda)\alpha \gamma_{t-\tilde{\tau}_j-\tilde{C}_{j+}}$ , because  $\tilde{\alpha}_t$  considers at least all the rejection times in  $\alpha_t$ , and has  $\tilde{C}_{j+} \geq C_{j+}$  (the same holds for the term  $((1-\lambda)\alpha - W_0)$ ).

## References

- Benjamini, Y. and Hochberg, Y. Controlling the false discovery rate: a practical and powerful approach to multiple testing. *Journal of the Royal Statistical Society, Series B (Methodological)*, 57(1):289–300, 1995.
- Benjamini, Y. and Yekutieli, D. The control of the false discovery rate in multiple testing under dependency. *The Annals of Statistics*, 29(4):1165–1188, 2001.
- Javanmard, A. and Montanari, A. Online rules for control of false discovery rate and false discovery exceedance. *The Annals of Statistics*, to appear, 2017.
- Ramdas, A., Barber, R. F., Wainwright, M., and Jordan, M. A unified treatment of multiple testing with prior knowledge. *arXiv preprint arXiv:1703.06222*, 2017.
- Storey, J. A direct approach to false discovery rates. *Journal of the Royal Statistical Society, Series B (Statistical Methodology)*, 64(3):479–498, 2002.
- Storey, J., Taylor, J., and Siegmund, D. Strong control, conservative point estimation and simultaneous conservative consistency of false discovery rates: a unified approach. *Journal of the Royal Statistical Society, Series B (Statistical Methodology)*, 66(1):187–205, 2004.
